# Supplementary material for: Coaxial nanotubes of stimuli responsive polymers with tunable release kinetics
Source: Royal Society of Chemistry journal article supplement (doi:10.1039/c5sm01074h), 2015-01-01
Supplement: c5sm01074h1.pdf [file c5sm01074h1.pdf]

## Coaxial Nanotubes of Stimuli Responsive Polymers with Tunable Release Kinetics

Efe Armagan<sup>1</sup>, Gozde Ozaydin Ince<sup>1,2\*</sup>

<sup>1</sup>Materials Science and Nanoengineering Program, Faculty of Engineering and Natural Sciences, Sabanci University, 34956 Istanbul, Turkey

<sup>2</sup>Sabanci University Nanotechnology Research and Application Center, 34956 Istanbul, Turkey

### Supporting Information

Table 1:

|         | NIPAAm flowrate (sccm) | HEMA flowrate (sccm) | MAA flowrate (sccm) | EGDMA flowrate (sccm) | TBPO flowrate (sccm) | N <sub>2</sub> flowrate (sccm) |
|---------|------------------------|----------------------|---------------------|-----------------------|----------------------|--------------------------------|
| pNIPAAm | 1.1                    | -                    | -                   | 0.07                  | 2                    | 1                              |
| pHEMA   | -                      | 0.7                  | -                   | 0.1                   | 1                    | 1                              |
| pMAA    | -                      | -                    | 1                   | 0.1                   | 0.8                  | 1                              |
| pEGDMA  | -                      | -                    | -                   | 0.15                  | 0.8                  | -                              |

Table 1: Flowrates of monomers for iCVD depositions of different polymers are shown.
